# Supplementary material
Source: publisher site journal article supplement (https://www.dovepress.com/article/390146)
Supplement: Supplementary file 1 [file get_supplementary_file.php]

Supplementary Table 1. List of International Classification of Disease codes used for identification of the cohort and comorbidities

| **Condition** | **ICD-9/ICD9-CM** | **ICD-10-AM** |
| --- | --- | --- |
| **Cohort selection** |  |  |
| Coronary heart disease | 410-414 | I20-I25 |
| Atrial fibrillation | 427.3 | I48 |
| Valvular heart disease | 393-398, 424 | I05-I09, I35-I39 |
| Prior stroke | 430, 431, 432.9, 433.x1, 434.x1, 436, 438 | I60, I61, I62.9, I63, I64, I69 |
| **Comorbidities** |  |  |
| Myocardial infarction | 410 | I21, I22 |
| Acute coronary syndrome | January 1, 1985 to December 31, 1987: 410, 411  January 1, 1988 to December 31, 2017: 410, 411.1 | I20.0, I21 |
| Heart failure | 428 | I50 |
| Rheumatic heart disease | 393-398 | I05.0, I05.1, I05.2, I05.8, I05.9, I06.0, I06.1, I06.2, I08.0, I08.1, I08.3, I08.9 I09.1, I09.8, I09.9 |
| Hypertension | 401-405 | I10-I15 |
| Endocarditis | 421.0, 397.9 | I33, I09.1 |
| Peripheral vascular disease | 440-448 | I70-I79 |
| Transient ischemic attack | 435 | G45 |
| COPD | 490-494, 496 | J40-J47 |
| Diabetes | 250 | E10-E14 |
| Congenital heart disease | 745-747 | Q20-Q28 |
| Alcohol and drug history | 304, 292, 303, 305.0, 291, 305.2-305.9, 357.6, 357.5, 425.5, 535.3, 571.0-571.3, 790.3, 965.00, 965.01, 980.0, 980.1, 980.9, 909.1, V58.89, E850.0-E850.2, E860.0-E860.2, E860.9, V65.4, V15.84, V15.85, | E24.4, F10-F16, F18-F19, F55, G31.2, G62.0, G62.1, G72.0, G72.1, I42.6, K29.2, K70, K85.2, K86.0, O35.4, O35.5, R78.0-R78.5, T40, T51.0, T51.1, T51.9, X42, X45, X62, X65, Y12, Y15, Y16, Y91.2, Y91.3, Z50.2, Z71.4, Z72.1, Z72.2, Z86.41 |
| Chronic kidney disease | *Pre-July 1, 1995*: 250.4, 590.0, 590.2, 590.3, 590.8, 593.0, 593.1, 593.2, 593.6, 593.9, 599.7, 753.0, 753.1, 753.2, 753.4, 996.1, V42.0, V45.1, 403, 404, 580, 581, 582, 583, 585, 586, 587, 588, 589, V56, 405.01, 405.11, 405.91, 405.02, 405.12, 405.92, 593.81, 996.81  *From July 1, 1995*: 250.4, 590.0, 590.2, 590.3, 590.8, 593.0, 593.1, 593.2, 593.6, 593.9, 599.7, 753.0, 753.1, 753.2, 753.4, 996.1, V42.0, V45.1, 403, 404, 580, 581, 582, 583, 585, 586, 587, 588, 589, V56, 405.01, 405.11, 405.91, 405.02, 405.12, 405.92, 593.81, 996.81 | E10.2, E11.2, E12.2, E13.2, E14.2, I15.0, I15.1, N39.1, N39.2, T82.4, Z94.0, Z99.2, I12, I13, N00, N01, N02, N03, N04, N05, N06, N07, N08, N11, N12, N14, N15, N16, N18, N19,N25, N26, N27, N28, Q60, Q61, Q62, Q63, Z49 |
| Mental Health | 293.0 – 302.99, 306.0 – 319.99 | F20.0 – F99.9 |

ICD, International Classification of Diseases; COPD, chronic obstructive pulmonary disease.

Supplementary Table 2. Definition of categories of cardiac conditions

| **Condition** | **Admission in principal or additional diagnosis fields** |
| --- | --- |
| CHD | CHD admission/s in principal or additional diagnosis fields |
| CHD only | CHD admission/s in principal or additional diagnosis fields  No admission/s for AF or VHD in the principal or additional diagnosis fields |
| AF | AF admission/s in principal or additional diagnosis fields |
| AF only | AF admission/s in principal or additional diagnosis fields  No admission/s for CHD or VHD in the principal or additional diagnosis fields |
| VHD | VHD admission/s in principal or additional diagnosis fields |
| VHD only | VHD admission/s in principal or additional diagnosis fields  No admission/s for CHD or AF in the principal or additional diagnosis fields |
| CHD +VHD | CHD and VHD admissions in the either the principal diagnosis or additional diagnosis fields  No admissions for AF in principal or additional diagnosis fields |
| CHD +AF | CHD and AF admissions in the either the principal diagnosis or additional diagnosis fields  No admissions for AF in principal or additional diagnosis fields |
| AF +VHD | AF and VHD admissions in the either the principal diagnosis or additional diagnosis fields  No admissions for CHD in principal or additional diagnosis fields |
| CHD+VHD+AF | CHD and VHD and AF admissions in the either the principal diagnosis or additional diagnosis fields |

CHD, coronary heart disease; AF, atrial fibrillation; VHD, valvular heart disease

Supplementary Table 3. Baseline characteristics of the study cohort, stratified by sex.

|  | **Any CHD (n=122,690)** | | **Any AF (n=63,573)** | | **Any VHD (n=21,864)** | |
| --- | --- | --- | --- | --- | --- | --- |
|  | **Female** | **Male** | **Female** | **Male** | **Female** | **Male** |
|  | **n=42,652** | **n=80,038** | **n=26,331** | **n=37,242** | **n=10,159** | **n=11,705** |
| Age (years), mean (±SD) | 72.2 (±13.0) | 68.4 (±12.5) | 76.0 (±12.2) | 70.3 (±13.6) | 69.8 (±16.5) | 69.4 (±14.8) |
| Age group (years) |  |  |  |  |  |  |
| 20-54 | 3783 (8.9) | 9471 (11.8) | 1390 ( 5.3) | 4195 (11.3) | 1772 (17.4) | 1665 (14.2) |
| 55-64 | 6615 (15.5) | 16,961 (21.2) | 2517 ( 9.6) | 5907 (15.9) | 1301 (12.8) | 1760 (15.0) |
| 65-74 | 10,241 (24.0) | 23,594 (29.5) | 5395 (20.5) | 9943 (26.7) | 2019 (19.9) | 2855 (24.4) |
| 75-84 | 12,038 (28.2) | 19,195 (24.0) | 8546 (32.5) | 10,481 (28.1) | 2618 (25.8) | 3331 (28.5) |
| 85-94 | 9975 (23.4) | 10,817 (13.5) | 8483 (32.2) | 6716 (18.0) | 2449 (24.1) | 094 (17.9) |
| Aboriginal | 1286 (3.0) | 1568 (2.0) | 354 ( 1.3) | 488 (1.3) | 432 ( 4.3) | 207 (1.8) |
| Comorbidities |  |  |  |  |  |  |
| Myocardial infarction | 14,563 (34.1) | 33,691 (42.1) | 2800 (10.6) | 5506 (14.8) | 1351 (13.3) | 2243 ( 19.2) |
| Acute coronary syndrome | 23,240 (54.5) | 46,500 (58.1) | 4113 (15.6) | 7531 (20.2) | 1953 (19.2) | 3016 ( 25.8) |
| Heart failure | 6925 (16.2) | 9593 (12.0) | 6556 (24.9) | 7733 (20.8) | 3093 (30.4) | 3416 (29.2) |
| Rheumatic heart disease | 113 (0.3) | 100 (0.1) | 196 (0.7) | 155 (0.4) | 392 (3.9) | 304 (2.6) |
| Hypertension | 26,001 (61.0) | 43,742 (54.7) | 12,886 (48.9) | 15,662 (42.1) | 4893 (48.2) | 5771 (49.3) |
| Endocarditis | 101 (0.2) | 194 (0.2) | 107 ( 0.4) | 205 (0.6) | 259 ( 2.5) | 425 (3.6) |
| Peripheral vascular disease | 3708 (8.7) | 7948 (9.9) | 2159 ( 8.2) | 3957 (10.6) | 1209 (11.9) | 2071 (17.7) |
| Transient ischemic attack | 1464 (3.4) | 2112 (2.6) | 1201 ( 4.6) | 1388 (3.7) | 436 ( 4.3) | 490 (4.2) |
| COPD | 7257 (17.0) | 7902 (9.9) | 4606 (17.5) | 4744 (12.7) | 1810 (17.8) | 1437 (12.3) |
| Chronic kidney disease | 5635 (13.2) | 8960 (11.2) | 3770 (14.3) | 5400 (14.5) | 1670 (16.4) | 2013 ( 17.2) |
| Diabetes | 10,713 (25.1) | 18,488 (23.1) | 5135 (19.5) | 7391 (19.8) | 1963 (19.3) | 2381 (20.3) |
| Congenital Heart Disease | 507 (1.2) | 775 (1.0) | 437 (1.7) | 642 (1.7) | 538 (5.3) | 825 (7.0) |
| Alcohol and drug history | 2331 (5.5) | 6370 (8.0) | 1114 (4.2) | 3672 (9.9) | 807 (7.9) | 1190 (10.2) |
| Mental Health | 6880 (16.1) | 6924 (8.7) | 3619 (13.7) | 3103 (8.3) | 1782 (17.5) | 1130 (9.7) |
| Charlson Comorbidity Index |  |  |  |  |  |  |
| 0 | 11,865 (27.8) | 21,158 (26.4) | 8801 (33.4) | 13,287 (35.7) | 3283 (32.3) | 3462 (29.6) |
| 1 | 10,310 (24.2) | 23,497 (29.4) | 5096 (19.4) | 6772 (18.2) | 2127 (20.9) | 2498 (21.3) |
| 2-3 | 12,042 (28.2) | 21,912 (27.4) | 7040 (26.7) | 9617 (25.8) | 2607 (25.7) | 3110 (26.6) |
| 3-4 | 2922 (6.9) | 5000 (6.2) | 1704 ( 6.5) | 2380 (6.4) | 668 (6.6) | 856 (7.3) |
| ≥5 | 5513 (12.9) | 8471 (10.6) | 3690 (14.0) | 5186 (13.9) | 1474 (14.5) | 1779 (15.2) |
| Procedures |  |  |  |  |  |  |
| PCI | 9165 (21.5) | 29,361 (36.7) | 1289 ( 4.9) | 3711 (10.0) | 666 (6.6) | 1385 (11.8) |
| CABG | 3001 (7.0) | 12,890 (16.1) | 1015 (3.9) | 4223 (11.3) | 628 (6.2) | 2084 (17.8) |
| Atrial ablation | 260 (0.6) | 669 (0.8) | 949 (3.6) | 2077 (5.6) | 254 (2.5) | 419 (3.6) |
| Carotid endarterectomy | 294 (0.7) | 899 (1.1) | 130 (0.5) | 367 (1.0) | 68 (0.7) | 166 (1.4) |
| CHA2DS2-VASc score |  |  |  |  |  |  |
| 1 | 20 (0.0) | 11,461 ( 14.3) | 27 (0.1) | 11,719 (31.5) | 8 (0.1) | 2809 (24.0) |
| 2-3 | 16,077 (37.7) | 47,499 ( 59.3) | 9655 (36.7) | 14,707 (39.5) | 4564 (44.9) | 5022 (42.9) |
| 4-5 | 18,085 (42.4) | 18,057 (22.6) | 10,832 (41.1) | 8893 (23.9) | 3569 (35.1) | 3201 (27.3) |
| >5 | 8470 (19.9) | 3021 (3.8) | 5817 (22.1) | 1923 (5.2) | 2018 (19.9) | 673 (5.7) |

n (%) unless otherwise indicated.

CHD, coronary heart disease; AF, atrial fibrillation; VHD, valvular heart disease; COPD, chronic obstructive pulmonary disease; PCI, percutaneous coronary intervention; CABG, coronary artery bypass grafting.

Supplementary Table 4. Baseline characteristics of the study cohort, categorized by cardiac condition for new cardiac cases

|  | **Any CHD (n=30,611)** | | **Any AF (n=20,237)** | **Any VHD (n=5021)** | | **Single Conditions**†**(n=48,458)** | | **Multiple Conditions**‡ **(n=3623)** |
| --- | --- | --- | --- | --- | --- | --- | --- | --- |
| Age (years), mean (±SD) | 65.5 (±12.9) | | 71.1 (±13.8) | 66.8 (±16.9) | | 66.8 (±14.0) | | 72.9 (±12.1) |
| Age group (years) |  | |  |  | |  | |  |
| 20-54 | 5786 (18.9) | | 2236 (11.0) | 1050 (20.9) | | 8569 (17.7) | | 248 (6.8) |
| 55-64 | 7910 (25.8) | | 3230 ( 6.0) | 755 (15.0) | | 10,800 (22.3) | | 541 (14.9) |
| 65-74 | 8682 (28.4) | | 5335 (26.4) | 1217 (24.2) | | 13,128 (27.1) | | 1029 (28.4) |
| 75-84 | 5642 (18.4) | | 5552 (27.4) | 1234 (24.6) | | 10,206 (21.1) | | 1080 (29.8) |
| 85-94 | 2591 (8.5) | | 3884 (19.2) | 765 (15.2) | | 5755 (11.9) | | 725 (20.0) |
| Female | 11,020 (36.0) | | 8966 (44.3) | 2161 (43.0) | | 19,409 (40.1) | | 1343 (37.1) |
| Aboriginal | 51 (0.2) | | 15 (0.01) | 6 (0.1) | | 136 (2.9) | | 59 (1.6) |
| Comorbidities |  | |  |  | |  | |  |
| Myocardial infarction | 13,222 (43.2) | | 1119 (5.5) | 448 (8.9) | | 11,792 (24.3) | | 1460 (40.3) |
| Acute coronary syndrome | 69,740 (56.8) | | 75 (0.1) | 4969 (22.7) | | 55,318 ( 37.6) | | 14,454 (50.5) |
| Heart failure | 16,158 (52.8) | | 1239 (6.1) | 493 (9.8) | | 14,578 (30.1) | | 1612 (44.5) |
| Rheumatic heart disease | 27 (0.09) | | 41 (0.02) | 106 (2.1) | | 47 (0.1) | | 59 (1.6) |
| Hypertension | 13,016 (42.5) | | 6199 (30.6) | 1617 (32.2) | | 17,256 (35.6) | | 1744 (48.1) |
| Endocarditis | 39 (0.1) | | 35 (0.2) | 132 (2.6) | | 158 (0.3) | | 24 (0.7) |
| Peripheral vascular disease | 1608 (5.3) | | 1171 (5.8) | 578 (11.5) | | 2512 ( 5.2) | | 407 (11.2) |
| Transient ischemic attack | 445 (1.5) | | 509 (2.5) | 97 (1.9) | | 917 (1.9) | | 67 (1.8) |
| COPD | 2918 (9.5) | | 2584 (12.8) | 560 (11.2) | | 5218 (10.8) | | 410 (11.3) |
| Chronic kidney disease | 3094 (10.1) | | 2615 (12.9) | 621 (12.4) | | 5146 (10.6) | | 572 (15.8) |
| Diabetes | 7480 (24.4) | | 3811 (18.8) | 944 (18.8) | | 10,454 (21.6) | | 870 (24.0) |
| Congenital Heart Disease | 186 (0.6) | | 149 (0.7) | 225 (4.5) | | 407 (0.8) | | 74 (2.0) |
| Alcohol and drug history | 2161 (7.1) | | 1455 (7.2) | 430 (8.6) | | 3618 (7.5) | | 211 (5.8) |
| Mental Health | 13,804 (11.3) | | 14,289 ( 22.5) | 2912 (13.3) | | 15,368 (10.5) | | 3735 (13.1) |
| Charlson Comorbidity Index |  |  | | |  | |  | |
| 0 | 8989 (29.4) | | 7883 (39.0) | 1895 (37.7) | | 17,159 (35.4) | | 794 (21.9) |
| 1 | 9273 (30.3) | | 3702 (18.3) | 1124 (22.4) | | 12,273 (25.3) | | 897 (24.8) |
| 2-3 | 7944 (26.0) | | 5077 (25.1) | 1227 (24.4) | | 11,935 (24.6) | | 1126 (31.1) |
| 3-4 | 1616 (5.3) | | 1039 (5.1) | 255 (5.1) | | 2321 (4.8) | | 285 (7.9) |
| ≥5 | 2789 (9.1) | | 2536 (12.5) | 520 (10.4) | | 4770 (9.8) | | 521 (14.4) |
| Procedures, n (%) |  | |  |  | |  | |  |
| PCI | 8151 (26.6) | | 384 (1.9) | 162 (3.2) | | 7651 (15.8) | | 513 ( 14.2) |
| CABG | 578 (1.9) | | 224 (1.1) | 115 (2.3) | | 359 (0.7) | | 263 (7.3) |
| Atrial ablation | 20 (0.1) | | 618 (3.1) | 29 (0.6) | | 578 (1.2) | | 42 (1.2) |
| Carotid endarterectomy | 113 (0.4) | | 69 (0.3) | 27 (0.5) | | 166 (0.3) | | 21 (0.6) |
| CHA2DS2-VASc score |  | |  |  | |  | |  |
| 1 | 3602 (11.8) | | 4141 (20.5) | 939 (18.7) | | 8028 (16.6) | | 325 (9.0) |
| 2-3 | 15,741 (51.4) | | 7378 (36.5) | 2022 (40.3) | | 22,529 (46.5) | | 1281 (35.4) |
| 4-5 | 7979 (26.1) | | 6290 (31.1) | 1486 (29.6) | | 13,186 (27.2) | | 1250 (34.5) |
| >5 | 3289 (10.7) | | 2428 (12.0) | 574 (11.4) | | 4715 (9.7) | | 767 (21.2) |

n (%) unless otherwise indicated.

†Includes people with one of the specified cardiac conditions.

‡Includes people with ≥2 of the specified cardiac conditions.

CHD, coronary heart disease; AF, atrial fibrillation; VHD, valvular heart disease; COPD, chronic obstructive pulmonary disease; PCI, percutaneous coronary intervention; CABG, coronary artery bypass grafting.

Supplementary Table 5. Baseline characteristics in the study cohort, categorized by cardiac condition for pre-existing cardiac cases

|  | **Any CHD (n=92,079)** | | **Any AF (n=43,336)** | **Any VHD (n=16,843)** | | **Single Conditions**† **(n=98,482)** | | **Multiple Conditions**‡**(n=24,997)** |
| --- | --- | --- | --- | --- | --- | --- | --- | --- |
| Age (years), mean (±SD) | 71.2 (±12.4) | | 73.4 (±13.1) | 70.4 (±15.1) | | 69.4 (±13.3) | | 75.8 (±11.1) |
| Age group (years) |  | |  |  | |  | |  |
| 20-54 | 7487 (8.1) | | 3318 (7.7) | 4717 (28.0) | | 11,325 (11.5) | | 911 (3.6) |
| 55-64 | 15,768 (17.1) | | 5211 (12.0) | 3741 (22.2) | | 18,256 (18.5) | | 2396 (9.6) |
| 65-74 | 25,089 (27.2) | | 10,030 (23.1) | 7037 (15.08) | | 26,754 (27.2) | | 5647 (22.6) |
| 75-84 | 25,546 (27.7) | | 13,415 (31.0) | 7998 (47.5) | | 24,889 (25.3) | | 8660 (34.6) |
| 85-94 | 18,189 (19.8) | | 11,362 (26.2) | 689 (4.1) | | 17,258 (17.5) | | 7383 (29.5) |
| Female | 31,632 (34.4) | | 17,365 (40.1) | 3741 (22.2) | | 36,852 (37.4) | | 9337 (37.4) |
| Aboriginal | 3081 (3.3) | | 923 (2.1) | 689 (4.1) | | 3297 (3.3) | | 649 (2.6) |
| Comorbidities |  | |  |  | |  | |  |
| Myocardial infarction | 35,032 (38.0) | | 7187 (16.6) | 3146 (18.7) | | 26,138 (26.5) | | 8894 (35.6) |
| Acute coronary syndrome | 69,740 (56.8) | | 75 (0.1) | 4969 (22.7) | | 55,318 (37.6) | | 14,454 (50.5) |
| Heart failure | 53,582 (58.2) | | 10,405 (24.0) | 4476 (26.6) | | 40,740 (41.4) | | 12,842 (51.4) |
| Rheumatic heart disease | 27 (0.09) | | 41 (0.02) | 106 (2.1) | | 47 (0.1) | | 59 (1.6) |
| Hypertension | 13,472 (14.6) | | 10,850 (25.0) | 5482 (32.5) | | 9620 (9.8) | | 8991 (36.0) |
| Endocarditis | 186 (0.2) | | 310 (0.7) | 590 (3.5) | | 204 (0.2) | | 388 (1.6) |
| Peripheral vascular disease | 1608 (5.3) | | 1171 (5.8) | 578 (11.5) | | 2512 (5.2) | | 407 (11.2) |
| Transient ischemic attack | 56,727 (61.6) | | 22,349 (51.6) | 9047 (53.7) | | 49,538 (50.3) | | 17,775 (71.1) |
| COPD | 909 (1.0) | | 2408 (5.6) | 644 (3.8) | | 1192 (1.2) | | 1216 (4.9) |
| Chronic kidney disease | 10,048 (10.9) | | 4945 (11.4) | 2702 (16.0) | | 7704 (7.8) | | 4515 (18.1) |
| Diabetes | 7480 (24.4) | | 3811 (18.8) | 944 (18.8) | | 10,454 (21.6) | | 870 (24.0) |
| Congenital Heart Disease | 3131 (3.4) | | 2080 (4.8) | 829 (4.9) | | 2883 (2.9) | | 1443 (5.8) |
| Alcohol and drug history | 6540 (7.1) | | 3331 (7.7) | 1567 (9.3) | | 7304 (7.4) | | 1918 (7.7) |
| Mental Health | 11,067 (12.0) | | 5045 (11.6) | 2424 (14.4) | | 11,023 (11.2) | | 3462 (13.8) |
| Charlson Comorbidity Index |  |  | | |  | |  | |
| 0 | 24,034 (26.1) | | 14,205 (32.8) | 4850 (28.8) | | 34,322 (34.9) | | 4188 (16.8) |
| 1 | 24,534 (26.6) | | 8166 (18.8) | 3501 (20.8) | | 25,409 (25.8) | | 5113 (20.5) |
| 2-3 | 26,010 (28.2) | | 11,580 (26.7) | 4490 (26.7) | | 25,202 (25.6) | | 7840 (31.4) |
| 3-4 | 6306 (6.8) | | 3045 (7.0) | 1269 (7.5) | | 5149 (5.2) | | 2515 (10.1) |
| ≥5 | 11,195 (12.2) | | 6340 (14.6) | 2733 (16.2) | | 8400 (8.5) | | 5341 (21.4) |
| Procedures |  | |  |  | |  | |  |
| PCI | 15,313 (16.6) | | 5014 (11.6) | 2597 (15.4) | | 9164 (9.3) | | 6162 (24.7) |
| CABG | 256 (0.3) | | 277 (0.6) | 552 (3.3) | | 290 (0.3) | | 346 (1.4) |
| Atrial ablation | 1080 (1.2) | | 428 (1.0) | 207 (1.2) | | 761 (0.8) | | 432 (1.7) |
| Carotid endarterectomy | 21,721 (23.6) | | 8715 (20.1) | 3400 (20.2) | | 9133 (19.4) | | 6775 (27.1) |
| CHA2DS2-VASc score |  | |  |  | |  | |  |
| 1 | 7879 (8.6) | | 7605 (17.5) | 1878 (11.2) | | 14,253 (14.5) | | 1500 (6.0) |
| 2-3 | 47,835 (51.9) | | 16,984 (39.2) | 7564 (44.9) | | 52,147 (53.0) | | 9588 (38.4) |
| 4-5 | 28,163 (30.6) | | 13,435 (31.0) | 5284 (31.4) | | 25,619 (26.0) | | 9753 (39.0) |
| >5 | 8202 (8.9) | | 5312 (12.3) | 2117 (12.6) | | 6463 (6.6) | | 4156 (16.6) |

n (%) unless otherwise indicated.

†Includes people with one of the specified cardiac conditions.

‡Includes people with ≥2 of the specified cardiac conditions.

CHD, coronary heart disease; AF, atrial fibrillation; VHD, valvular heart disease; COPD, chronic obstructive pulmonary disease; PCI, percutaneous coronary intervention; CABG, coronary artery bypass grafting.

Supplementary Table 6. Distribution of incident stroke events occurring in the cardiac cohort between November 1, 2012 and October 31, 2017, stratified by fatal vs non-fatal stroke, age group, and sex.

|  | **Any CHD** | **Any AF** | **Any VHD** | **Single cardiac condition**† | **Multiple cardiac conditions**‡ | **Total** |
| --- | --- | --- | --- | --- | --- | --- |
| ***Pre-existing cardiac cases*** |  |  |  |  |  |  |
| Total cardiac cases | 92,079 | 43,336 | 16,843 | 98,482 | 24,997 | 123,479 |
| Total strokes, n (% of cardiac cases) | 3016 (3.3) | 2231 (5.2) | 733 (4.4) | 2904 (3.0) | 1405 (5.6) | 4309 (3.49) |
| Fatal/Non-fatal |  |  |  |  |  |  |
| Non-fatal | 1778 (59.0) | 1448 (64.9) | 375 (51.2) | 1726 (59.4) | 725 (51.6) | 2451 (56.9) |
| Fatal | 1238 (41.0) | 1083 (48.5) | 358 (48.8) | 1178 (40.6) | 680 (48.4) | 1858 (43.1) |
| Sex |  |  |  |  |  |  |
| Men | 1774 (58.8) | 1121 (50.2) | 367 (50.1) | 1566 (53.9) | 781 (55.6) | 2347 (54.5) |
| Women | 1242 (41.2) | 1110 (49.8) | 366 (49.9) | 1338 (46.1) | 624 (44.4) | 1962 (45.5) |
| Age group (years) |  |  |  |  |  |  |
| 20-54 | 85 (2.8) | 39 (1.7) | 31 (4.2) | 109 (3.8) | 20 (1.4) | 129 (3.0) |
| 55-64 | 257 (8.5) | 119 (5.3) | 42 (5.7) | 269 (9.3) | 69 (4.9) | 338 (7.8) |
| 65-74 | 577 (19.1) | 311 (13.9) | 124 (16.9) | 536 (18.5) | 221 (15.7) | 757 (17.6) |
| 75-84 | 1077(35.7) | 801 (35.9) | 261 (35.6) | 992 (34.2) | 526 (37.4) | 1518 (35.2) |
| 85-94 | 1020 (33.8) | 961 (43.7) | 275 (37.5) | 998 (34.4) | 569 (40.5) | 1567 (36.4) |
| ***New cardiac cases*** |  |  |  |  |  |  |
| Total cardiac cases | 30,611 | 20,237 | 5021 | 48,458 | 3623 | 52,081 |
| Total strokes, n  (% of cardiac cases) | 464 (1.5) | 1081 (5.3) | 144 (2.9) | 1438 (3.0) | 124 (3.4) | 1562 (3.0) |
| Fatal/Non-fatal |  |  |  |  |  |  |
| Non-Fatal | 303 (65.3) | 780 (72.2) | 97 (67.4) | 1027 (71.4) | 76 (61.3) | 1103 (70.6) |
| Fatal | 161 (34.7) | 301 (27.8) | 47 (32.6) | 411 (82.6) | 48 (38.7) | 459 (29.4) |
| Sex |  |  |  |  |  |  |
| Men | 261 (56.3) | 504 (46.6) | 78 (54.2) | 711 (49.4) | 65 (52.4) | 776 (49.7) |
| Women | 203 (43.8) | 577 (53.4) | 66 (45.8) | 727 (50.6) | 59 (47.6) | 786 (50.3) |
| Age (years) § |  |  |  |  |  |  |
| 20-54 | 35 (7.5) | 45 (4.2) | 28 (19.4) | 85 (5.9) | 11 (8.9) | 96 (6.1) |
| 55-64 | 60 (12.9) | 78 (7.2) | 19 (13.2) | 141 (9.8) | 8 (6.5) | 149 (9.5) |
| 65-74 | 106 (22.8) | 222 (20.5) | 27 (18.8) | 320 (22.3) | 17 (13.7) | 337 (21.6) |
| 75-84 | 138 (29.7) | 350 (32.4) | 37 (25.7) | 443 (30.8) | 41 (33.1) | 484 (31.0) |
| 85-94 | 125 (26.9) | 386 (35.7) | 33 (22.9) | 449 (31.2) | 47 (37.9) | 496 (31.8) |

n (%) unless otherwise indicated.

†Includes people with one of the specified cardiac conditions.

‡Includes people with ≥2 of the specified cardiac conditions.

CHD, coronary heart disease; AF, atrial fibrillation; VHD, valvular heart disease.

Supplementary Table 7. Stroke incidence rates for all cardiac cases, stratified by age-group, fatal vs non-fatal stroke, and sex.*

|  | **Incidence rate per 1000 person-years (95% confidence interval)** | | | | | | | | | |
| --- | --- | --- | --- | --- | --- | --- | --- | --- | --- | --- |
|  | **Any CHD** | | **Any AF** | | **Any VHD** | | **Single cardiac condition**† | | **Multiple cardiac conditions**‡ | |
|  | **Male** | **Female** | **Male** | **Female** | **Male** | **Female** | **Male** | **Female** | **Male** | **Female** |
| **Ages 20-54 years** | | | | | | | | | | |
| Non-fatal stroke | 1.6 | 1.3 | 2.1 | 2.6 | 2.6 | 2.7 | 1.5 | 1.3 | 4.2 | 6.4 |
| (1.2-2.0) | (0.8-1.9) | (1.6-2.9) | (1.7-4.2) | (1.7-3.9) | (1.8-4.0) | (1.3-1.9) | (1.0-1.8) | (2.6-6.9) | (3.4-11.9) |
| Fatal stroke | 0.3 | 0.6 | 0.7 | 1.2 | 0.85 | 0.9 | 0.4 | 0.7 | 0.5 | 1.9 |
| (0.1-0.5) | (0.3-1.1) | (0.4-1.1) | (0.59-2.4) | (0.41-1.8) | (0.5-1.9) | (0.3-0.6) | (0.4-1.0) | (0.1-2.1) | (0.6-6.0) |
| **Ages 55-64 years** | | | | | | | | | | |
| Non-fatal stroke | 2.4 | 1.7 | 3.8 | 4.1 | 3.7 | 2.4 | 2.4 | 2.1 | 4.9 | 4.2 |
| (2.1-2.8) | (1.3-2.2) | (3.1-4.6) | (3.1-5.4) | (2.6-5.3) | (1.4-3.9) | (2.1-2.7) | (1.7-2.6) | (3.7-6.4) | (2.5-7.0) |
| Fatal stroke | 0.6 | 0.6 | 0.7 | 1.6 | 0.8 | 1.3 | 0.6 | 0.7 | 0.7 | 1.7 |
| (0.4-0.7) | (0.4-0.9) | (0.6-1.1) | (0.9-2.3) | (0.4-1.8) | (0.6-2.5) | (0.5-0.8) | (0.5-1.0) | (0.3-1.5) | (0.8-3.8) |
| **Ages 65-74 years** | | | | | | | | | | |
| Non-fatal stroke | 3.3 | 3.0 | 5.6 | 5.7 | 5.6 | 3.8 | 3.4 | 3.5 | 5.8 | 5.3 |
| (3.0-3.6) | (2.6-3.6) | (5.0-6.3) | (4.8-6.7) | (4.4-7.0) | (2.7-5.2) | (3.1-3.8) | (3.1-4.0) | (4.9-6.9) | (4.0-7.2) |
| Fatal stroke | 1.0 | 1.0 | 1.6 | 1.9 | 2.1 | 1.5 | 0.9 | 1.1 | 2.2 | 2.4 |
| (0.8-1.2) | (0.8-1.3) | (1.3-2.0) | (1.5-2.5) | (1.5-3.1) | (0.9-2.5) | (0.7-1.1) | (0.8-1.4) | (1.6-2.9) | (1.5-3.7) |
| **Ages 75-84 years** | | | | | | | | | | |
| Non-fatal stroke | 5.2 | 5.5 | 8.2 | 9.2 | 6.0 | 6.9 | 5.7 | 6.5 | 7.2 | 8.3 |
| (4.8-5.8) | (4.9-6.2) | (7.4-9.1) | (8.3-10.3) | (4.9-7.5) | (5.6-8.6) | (5.2-6.2) | (5.9-7.1) | (6.2-8.3) | (7.0-9.9) |
| Fatal stroke | 3.0 | 4.0 | 4.7 | 5.6 | 4.7 | 6.0 | 2.5 | 3.3 | 5.6 | 7.7 |
| (2.7-3.4) | (3.5-4.5) | (4.1-5.4) | (4.9-6.5) | (3.7-6.0) | (4.7-7.6) | (2.2-2.9) | (2.9-3.8) | (4.8-6.6) | (6.4-9.2) |
| **Ages 85-94 years** | | | | | | | | | | |
| Non-fatal stroke | 5.1 | 7.2 | 9.2 | 11.7 | 6.7 | 7.4 | 6.2 | 8.4 | 7.3 | 9.7 |
| (4.5-5.9) | (6.4-8.1) | (8.1-10.5) | (10.6-13.0) | (4.9-8.7) | (5.7-9.5) | (5.4-7.0) | (7.6-9.3) | (6.0-8.8) | (8.2-11.6) |
| Fatal stroke | 8.0 | 10.1 | 12.1 | 15.6 | 11.2 | 14.5 | 7.5 | 10.8 | 12.6 | 15.6 |
| (7.1-8.9) | (9.1-11.2) | (10.8-13.5) | (14.3-17.1) | (9.0-13.9) | (12.1-17.3) | (6.7-8.4) | (9.9-11.8) | (10.8-14.6) | (13.7-17.9) |
| **All ages** | | | | | | | | | | |
| Total stroke | 6.4 | 8.9 | 11.9 | 18.6 | 10.2 | 11.2 | 6.5 | 9.9 | 12.3 | 17.6 |
| (6.2-6.7) | (8.5-9.4) | (11.3-12.5) | (17.7-19.5) | (9.3-11.2) | (10.2-12.3) | (6.2-6.8) | (9.5-10.3) | (11.5-13.1) | (16.3-19.0) |
| Total stroke | 7.8 | 6.8 | 14.3 | 11.7 | 10.5 | 10.3 | 9.1 | 7.3 | 13.0 | 11.0 |
| (ASR) | (7.4-8.2) | (6.5-7.1) | (13.5-15.0) | (11.1-12.2) | (9.4-11.5) | (9.3-11.2) | (8.7-9.5) | (7.0-7.6) | (11.8-14.2) | (10.2-11.8) |
| Non-fatal stroke | 3.5 | 4.1 | 6.1 | 8.2 | 5.0 | 4.9 | 3.6 | 4.7 | 6.3 | 7.8 |
| (3.3-3.7) | (3.9-4.4) | (5.7-6.5) | (7.7-8.7) | (4.5-5.7) | (4.2-5.5) | (3.4-3.8) | (4.5-5.0) | (5.8-6.9) | (7.0-8.6) |
| Non-fatal stroke (ASR ) | 4.2 | 4.4 | 7.3 | 8.5 | 6.0 | 5.4 | 3.8 | 4.1 | 6.5 | 7.1 |
| (4.0-4.4) | (4.1-4.7) | (6.8-7.7) | (8.0-9.2) | (5.3-6.7) | (4.7-6.2) | (3.6-4.0) | (3.8-4.4) | (5.9-7.2) | (6.2-8.1) |
| Fatal stroke | 2.0 | 3.5 | 3.7 | 6.8 | 3.7 | 5.0 | 1.7 | 3.3 | 4.9 | 8.5 |
| (1.9-2.2) | (3.2-3.7) | (3.4-4.0) | (6.3-7.3) | (3.2-4.2) | (4.4-5.7) | (1.6-1.9) | (3.1-3.6) | (4.5-5.5) | (7.6-9.4) |
| Fatal stroke (ASR) | 2.6 | 3.4 | 4.4 | 5.8 | 4.3 | 5.1 | 2.6 | 3.6 | 4.5 | 5.9 |
| (2.5-2.8) | (3.1-3.7) | (4.1-4.8) | (5.4-6.3) | (3.7-4.9) | (4.4-5.8) | (2.4-2.8) | (3.4-3.9) | (4.0-4.9) | (5.2-6.6) |

Incidence rates are crude unless otherwise specified.

†Includes people with one of the specified cardiac conditions.

‡Includes people with ≥2 of the specified cardiac conditions.

CHD, coronary heart disease; AF, atrial fibrillation; VHD, valvular heart disease; ASR, age standardized rate.

Supplementary Table 8. Incidence rates of stroke for new cardiac cases, stratified by age-group, fatal vs non-fatal stroke, and sex

| **Incidence rate per 1000 person-years (95% confidence interval)** | | | | | | | | | | | | | | | | | | | |
| --- | --- | --- | --- | --- | --- | --- | --- | --- | --- | --- | --- | --- | --- | --- | --- | --- | --- | --- | --- |
|  | **Any CHD** | | | **Any AF** | | | | **Any VHD** | | | | **Single Cardiac Condition**† | | | | **Multiple Cardiac Conditions**‡ | | | |
|  | **Male** | **Female** | | **Male** | | **Female** | | **Male** | | **Female** | | **Male** | | **Female** | | **Male** | | **Female** | |
| **Ages 20-54 years** | | | | | | | | | | | | | | | | | | | |
| Non-fatal stroke | 0.9 | 0.7 | | 2.3 | | 3.7 | | 4.8 | | 5.1 | | 1.3 | | 1.7 | | 7.0 | | 10.0 | |
| (0.6-1.4) | (0.3-1.6) | | (1.5-3.6) | | (2.4-6.7) | | (2.9-7.9) | | (2.8-9.1) | | (0.9-0.7) | | (1.10-2.55) | | (3.3-15.0) | | (3.3-32.0) | |
| Fatal stroke | 0.2 | 0.6 | | 1.1 | | 1.7 | | 0.6 | | 0.0 | | 0.5 | | 0.8 | | 1.0 | | 0.0 | |
| (0.1-0.6) | (0.2-1.4) | | (0.6-2.0) | | (0.7-4.1) | | (0.2-2.5) | |  | | (0.3-0.8) | | (0.4-1.4) | | (0.4-7.1) | |  | |
| **Ages 55-64 years** | | | | | | | | | | | | | | | | | | | |
| Non-fatal stroke | 1.1 | 0.9 | | 3.4 | | 4.8 | | 3.4 | | 3.2 | | 1.9 | | 1.9 | | 1.4 | | 6 | |
| (0.8-1.6) | (0.5-1.6) | | (2.4-4.6) | | (3.3-7.0) | | (1.7-6.4) | | (1.2-8.5) | | (1.5-2.4) | | (1.4-2.7) | | (0.5-4.3) | | (2.2-16.0) | |
| Fatal stroke | 0.5 | 0.4 | | 0.6 | | 1.2 | | 1.1 | | 2.4 | | 0.6 | | 0.7 | | 0.0 | | 1.5 | |
| (0.3-0.8) | (0.8-1.0) | | (0.3-1.3) | | (0.6-2.6) | | (0.4-3.5) | | (0.8-7.4) | | (0.4-0.9) | | (0.4-1.3) | |  | | (0.2-11.0) | |
| **Ages 65-74 years** | | | | | | | | | | | | | | | | | | | |
| Non-fatal stroke | 1.7 | 2.2 | | 7.0 | | 6.6 | | 3.7 | | 2.9 | | 3.8 | | 4.3 | | 2.8 | | 0.7 | |
| (1.3-2.3) | (1.5-3.1) | | (5.9-8.5) | | (5.2-8.3) | | (2.1-6.3) | | (1.4-6.1) | | (3.3-4.5) | | (3.6-5.2) | | (1.5-5.1) | | (0.1-4.9) | |
| Fatal stroke | 0.7 | 0.5 | | 1.2 | | 1.9 | | 1.4 | | 0.8 | | 0.8 | | 1.1 | | 1.4 | | 1.1 | |
| (0.4-1.1) | (0.2-1.0) | | (0.8-1.9) | | (1.2-2.9) | | (0.6-3.4) | | (0.2-3.3) | | (0.6-1.1) | | (0.7-1.6) | | (0.6-1.1) | | (0.7-1.6) | |
| **Ages 75-84 years** | | | | | | | | | | | | | | | | | | | |
| Non-fatal stroke | 3.9 | 3.1 | | 9.7 | | 10.6 | | 4.0 | | 4.0 | | 6.7 | | 7.1 | | 5.3 | | 5.3 | |
| (3.0-5.0) | (2.3-4.3) | | (8.2-11.5) | | (9.0-12.4) | | (2.3-6.9) | | (2.3-7.1) | | (5.7-7.8) | | (6.1-8.2) | | (3.2-8.6) | | (3.0-9.3) | |
| Fatal stroke | 1.6 | 13.6 | | 2.6 | | 2.6 | | 2.2 | | 1.7 | | 2.0 | | 2.0 | | 2.6 | | 2.2 | |
| (1.1-2.4) | (0.9-21.0) | | (1.9-3.6) | | (1.9-3.7) | | (1.0-4.5) | | (0.7-4.1) | | (1.5-2.6) | | (1.5-2.6) | | (1.3-5.3) | | (0.9-5.3) | |
| **Ages 85-94 years** | | | | | | | | | | | | | | | | | | | |
| Non-fatal stroke | 3.0 | | 7.1 | | 13.0 | | 13.9 | | 2.6 | | 4.8 | | 9.1 | | 11.1 | | 4.2 | | 7.9 |
| (1.8-4.9) | | (5.4-9.5) | | (10.5-16.0) | | (11.8-16.3) | | (1.0-6.7) | | (2.5-9.3) | | (7.4-11.0) | | (9.8-13.1) | | (1.9-9.4) | | (4.8-13.1) |
| Fatal stroke | 5.9 | | 6.4 | | 7.3 | | 11.3 | | 5.2 | | 8.0 | | 6.5 | | 8.9 | | 7.0 | | 11.0 |
| (4.1-8.5) | | (4.7-8.6) | | (5.5-9.7) | | (9.4-13.5) | | (2.6-10.4) | | (4.8-13.3) | | (5.1-8.2) | | (7.5-11.0) | | (3.8-13.0) | | (6.8-16.0) |
| **All ages** | | | | | | | | | | | | | | | | | | | |
| Total stroke | 5.6 | | 7.8 | | 19.0 | | 27.6 | | 11.8 | | 12.8 | | 10.3 | | 15.9 | | 12.5 | | 19.3 |
| (5.0-6.3) | | (6.8-9.0) | | (17.4-20.7) | | (25.5-30.0) | | (9.4-14.7) | | (10.1-16.3) | | (9.6-11.1) | | (14.8-17.1) | | (9.8-16.0) | | (14.9-24.9) |
| Total stroke | 8.5 | | 8.0 | | 20.1 | | 23.5 | | 12.7 | | 12.3 | | 15.4 | | 13.5 | | 16.2 | | 12.9 |
| (ASR) | (7.3-9.7) | | (6.9-9.1) | | (18.3-21.9) | | (21.4-25.5) | | (9.4-15.9) | | (9.5-15.1) | | (14.2-16.5) | | (12.4-14.5) | | (10.9-21.5) | | (9.7-16.2) |
| Non-fatal stroke | 1.7 | | 2.5 | | 6.9 | | 9.2 | | 3.8 | | 4.0 | | 3.7 | | 5.3 | | 3.7 | | 5.3 |
| (1.5-2.0) | | (2.1-2.9) | | (6.2-7.7) | | (8.3-10.1) | | (2.9-5.0) | | (3.0-5.4) | | (3.4-4.0) | | (4.9-5.8) | | (2.8-5.0) | | (3.8-7.4) |
| Non-fatal stroke (ASR) | 4.8 | | 5.6 | | 15.3 | | 17.0 | | 15.3 | | 17.0 | | 9.7 | | 10.9 | | 8.6 | | 10.9 |
| (4.0-5.6) | | (4.7-6.6) | | (13.8-16.9) | | (15.2-18.8) | | (13.8-16.9) | | (15.2-18.8) | | (8.8-10.5) | | (10.0-11.9) | | (5.9-11.3) | | (6.3-15.5) |
| Fatal stroke | 0.9 | | 1.4 | | 2.1 | | 4.3 | | 1.8 | | 2.3 | | 1.3 | | 2.5 | | 2.1 | | 4.1 |
| (0.8-1.1) | | (1.1-1.7) | | (1.8-2.6) | | (3.7-5.0) | | (1.2-2.6) | | (1.6-3.5) | | (1.1-1.5) | | (2.2-2.8) | | (1.4-3.2) | | (2.8-6.0) |
| Fatal stroke | 3.3 | | 3.2 | | 4.9 | | 6.9 | | 4.4 | | 4.7 | | 3.9 | | 4.8 | | 4.6 | | 5.7 |
| (ASR) | (2.5-4.0) | | (2.5-3.9) | | (4.0-5.7) | | (5.8-7.9) | | (2.6-6.1) | | (2.8-6.6) | | (3.3-4.5) | | (4.2-5.4) | | (2.7-6.4) | | (3.0-8.4) |

Incidence rates are crude unless otherwise specified.

†Includes people with one of the specified cardiac conditions.

‡Includes people with ≥2 of the specified cardiac conditions.

CHD, coronary heart disease; AF, atrial fibrillation; VHD, valvular heart disease; ASR, age standardized rate.

Supplementary Table 9. Stroke incidence rates for pre-existing cases, stratified by age-group, fatal vs non-fatal stroke, and sex

| **Incidence rate per 1000 person-years (95% confidence interval)** | | | | | | | | | | |
| --- | --- | --- | --- | --- | --- | --- | --- | --- | --- | --- |
|  | **Any CHD** | | **Any AF** | | **Any VHD** | | **Single Cardiac Condition**† | | **Multiple Cardiac Conditions**‡ | |
|  | **Male** | **Female** | **Male** | **Female** | **Male** | **Female** | **Male** | **Female** | **Male** | **Female** |
| **Ages 20-54 years** | | | | | | | | | | |
| Non-fatal stroke | 2.1 | 1.7 | 2.0 | 1.8 | 1.2 | 1.9 | 1.8 | 1.0 | 3.2 | 5.5 |
| (1.6-2.8) | (1.1-2.8) | (1.3-3.0) | (0.9-3.8) | (0.5-2.6) | (1.06- 3.29) | (1.4-2.2) | (0.7-1.6) | (1.7-6.2) | (2.0-11.5) |
| Fatal stroke | 0.3 | 0.6 | 0.4 | 0.8 | 1.0 | 1.2 | 0.4 | 0.6 | 0.4 | 2.4 |
| (0.2-0.6) | (0.3-1.4) | (0.2-1.0) | (0.2-2.4) | (0.4-2.4) | (0.6-2.5) | (0.3-0.7) | (0.3-1.1) | (0.0-2.5) | (0.8-7.3) |
| **Ages 55-64 years** | | | | | | | | | | |
| Non-fatal stroke | 3.1 | 2.2 | 4.1 | 3.6 | 3.9 | 2.2 | 2.6 | 2.2 | 5.8 | 3.8 |
| (2.7-3.6) | (1.6-3.0) | (3.2-5.1) | (2.4-5.3) | (2.6-5.9) | (1.2-3.9) | (2.3-3.1) | (1.7-2.8) | (4.3-7.7) | (2.1-6.9) |
| Fatal stroke | 0.6 | 0.6 | 0.7 | 1.6 | 0.7 | 1.0 | 0.6 | 0.7 | 0.9 | 1.7 |
| (0.42- 0.8) | (0.4-1.1) | (0.4-1.3) | (0.9-3.0) | (0.3-1.9) | (0.4-2.4) | (0.4-0.8) | (0.4-1.1) | (0.4-1.9) | (0.7-4.2) |
| **Ages 65-74 years** | | | | | | | | | | |
| Non-fatal stroke | 3.8 | 3.5 | 4.9 | 5.0 | 6.2 | 4.1 | 3.3 | 3.1 | 6.4 | 6.3 |
| (3.4-4.2) | (2.9-4.2) | (4.1-5.7) | (4.0-6.3) | (4.9-8.0) | (2.8-5.9) | (2.9-3.7) | (2.6-3.6) | (5.4-7.7) | (4.7-8.5) |
| Fatal stroke | 1.0 | 1.3 | 1.8 | 2 | 2.4 | 1.7 | 0.9 | 1.1 | 2.3 | 2.7 |
| (0.9-1.3) | (0.9-1.7) | (1.4-2.4) | (1.4-2.8) | (1.6-3.0) | (1.0-3.1) | (0.7-1.1) | (0.8-1.4) | (1.7-3.1) | (1.7-4.3) |
| **Ages 75-84 years** | | | | | | | | | | |
| Non-fatal stroke | 5.5 | 6.2 | 7.6 | 8.5 | 6.7 | 7.9 | 5.3 | 6.2 | 7.4 | 8.8 |
| (5.0-6.1) | (5.5-7.0) | (6.7-8.6) | (7.4-9.7) | (5.3–8. 4) | (6.2-10.1) | (4.8-5.9) | (5.5-7.0) | (6.4-8.7) | (7.3-10.6) |
| Fatal stroke | 3.3 | 4.8 | 5.6 | 7.3 | 5.5 | 7.5 | 2.7 | 4.0 | 6.0 | 8.7 |
| (2.9-3.8) | (4.1-5.5) | (4.8-6.5) | (6.4-8.6) | (4.2-7.0) | (5.8-9.5) | (2.4-3.2) | (3.5-4.6) | (5.1-7.1) | (7.2-10.0) |
| **Ages 85-94 years** | | | | | | | | | | |
| Non-fatal stroke | 5.6 | 7.7 | 7.9 | 11.5 | 7.8 | 8.9 | 5.8 | 7.6 | 7.8 | 10.9 |
| (4.8-6.4) | (6.8 -8.8) | (6.7 –-9.4) | (10.2 -13.1) | (5.8-10.5) | (6.9 -11.5) | (4.5 – 6.2) | (6.7 -8.6) | (6.4– 9.5) | (9.2 – 13.0) |
| Fatal stroke | 8.8 | 12.4 | 14.7 | 20.0 | 13.5 | 18.8 | 8.3 | 13.0 | 14.0 | 19.0 |
| (7.8-9.9) | (11.2-13.7) | (13.0- 6.6) | (18.2-22.1) | (10.8-16.9) | (15.7-22.4) | (7.4-9.4) | (12.0-14.0) | (12.0-16.0) | (17.0-22.0 ) |
| **All ages** | | | | | | | | | | |
| Total stroke | 6.6 | 9.1 | 10.2 | 15.9 | 9.9 | 10.9 | 5.6 | 8.2 | 12.3 | 17.5 |
| (6.3-6.9) | (8.6-9.6) | (9.6-10.8) | (15.0-16.9) | (9.0-11.0) | (9.9-12.1) | (5.3-5.9) | (7.8-8.7) | (11.4-13.2) | (16.2-18.9) |
| Total stroke | 7.7 | 6.8 | 11.5 | 9.8 | 10.2 | 9.8 | 7.4 | 6.1 | 12.7 | 10.8 |
| (ASR) | (7.2-8.1) | (6.4-7.1) | (10.7-12.2) | (9.2-10.4) | (9.2-11.3) | (8.8-10.8) | (7.0-7.8) | (5.8-6.4) | (11.5-13.9) | (10.0-11.6) |
| Non-fatal stroke | 4.2 | 4.9 | 5.7 | 7.8 | 5.5 | 5.3 | 3.6 | 4.5 | 6.8 | 8.5 |
| (3.9-4.4) | (4.6-5.3) | (5.3-6.1) | (7.2-8.5) | (4.8-6.4) | (4.5-6.1) | (3.4-3.8) | (4.2-4.8) | (6.2-7.5) | (7.6-9.5) |
| Non-fatal stroke (ASR) | 4.2 | 4.3 | 5.5 | 6.0 | 5.6 | 5.1 | 3.8 | 4.1 | 6.3 | 6.8 |
| (3.9-4.4) | (3.9-4.6) | (5.1-5.9) | (5.4-6.6) | (4.8-6.3) | (4.3-5.8) | (3.6-4.0) | (3.8-4.4) | (5.7-7.0) | (5.8-7.7) |
| Fatal stroke | 2.5 | 4.6 | 4.6 | 9.0 | 4.5 | 6.3 | 2.0 | 4.1 | 5.7 | 10.1 |
| (2.3-2.7) | (4.3-5.0) | (4.3-5.1) | (8.3-9.7) | (3.9-5.3) | (5.5-7.2) | (1.9-2.2) | (3.8-4.4) | (5.1-6.3) | (9.1-11.1) |
| Fatal stroke | 2.6 | 3.4 | 15.3 | 17.0 | 4.2 | 5.2 | 2.3 | 3.3 | 4.4 | 5.9 |
| (ASR) | (2.4-2.8) | (3.1-3.7) | (13.8-16.9) | (15.2-18.8) | (3.6-4.9) | (4.4-5.9) | (2.1-2.5) | (3.0-3.6) | (4.0-4.9) | (5.2-6.7) |

Incidence rates are crude unless otherwise specified.

† Includes people identified in the cohort who only have one of the specified cardiac conditions.

‡ Includes people identified in the cohort who have more than one of the specified cardiac conditions.

CHD, coronary heart disease; AF, atrial fibrillation; VHD, valvular heart disease; ASR age standardized rate.

Supplementary Figure 1. Distribution of cardiac conditions within the cohort.

CHD, coronary heart disease; AF, atrial fibrillation; VHD, valvular heart disease.

Supplementary Figure 2. Sensitivity analysis in new cardiac cases with concurrent first stroke with varying duration of person-time used in incidence rate calculations.

CHD, coronary heart disease; AF, atrial fibrillation; VHD, valvular heart disease


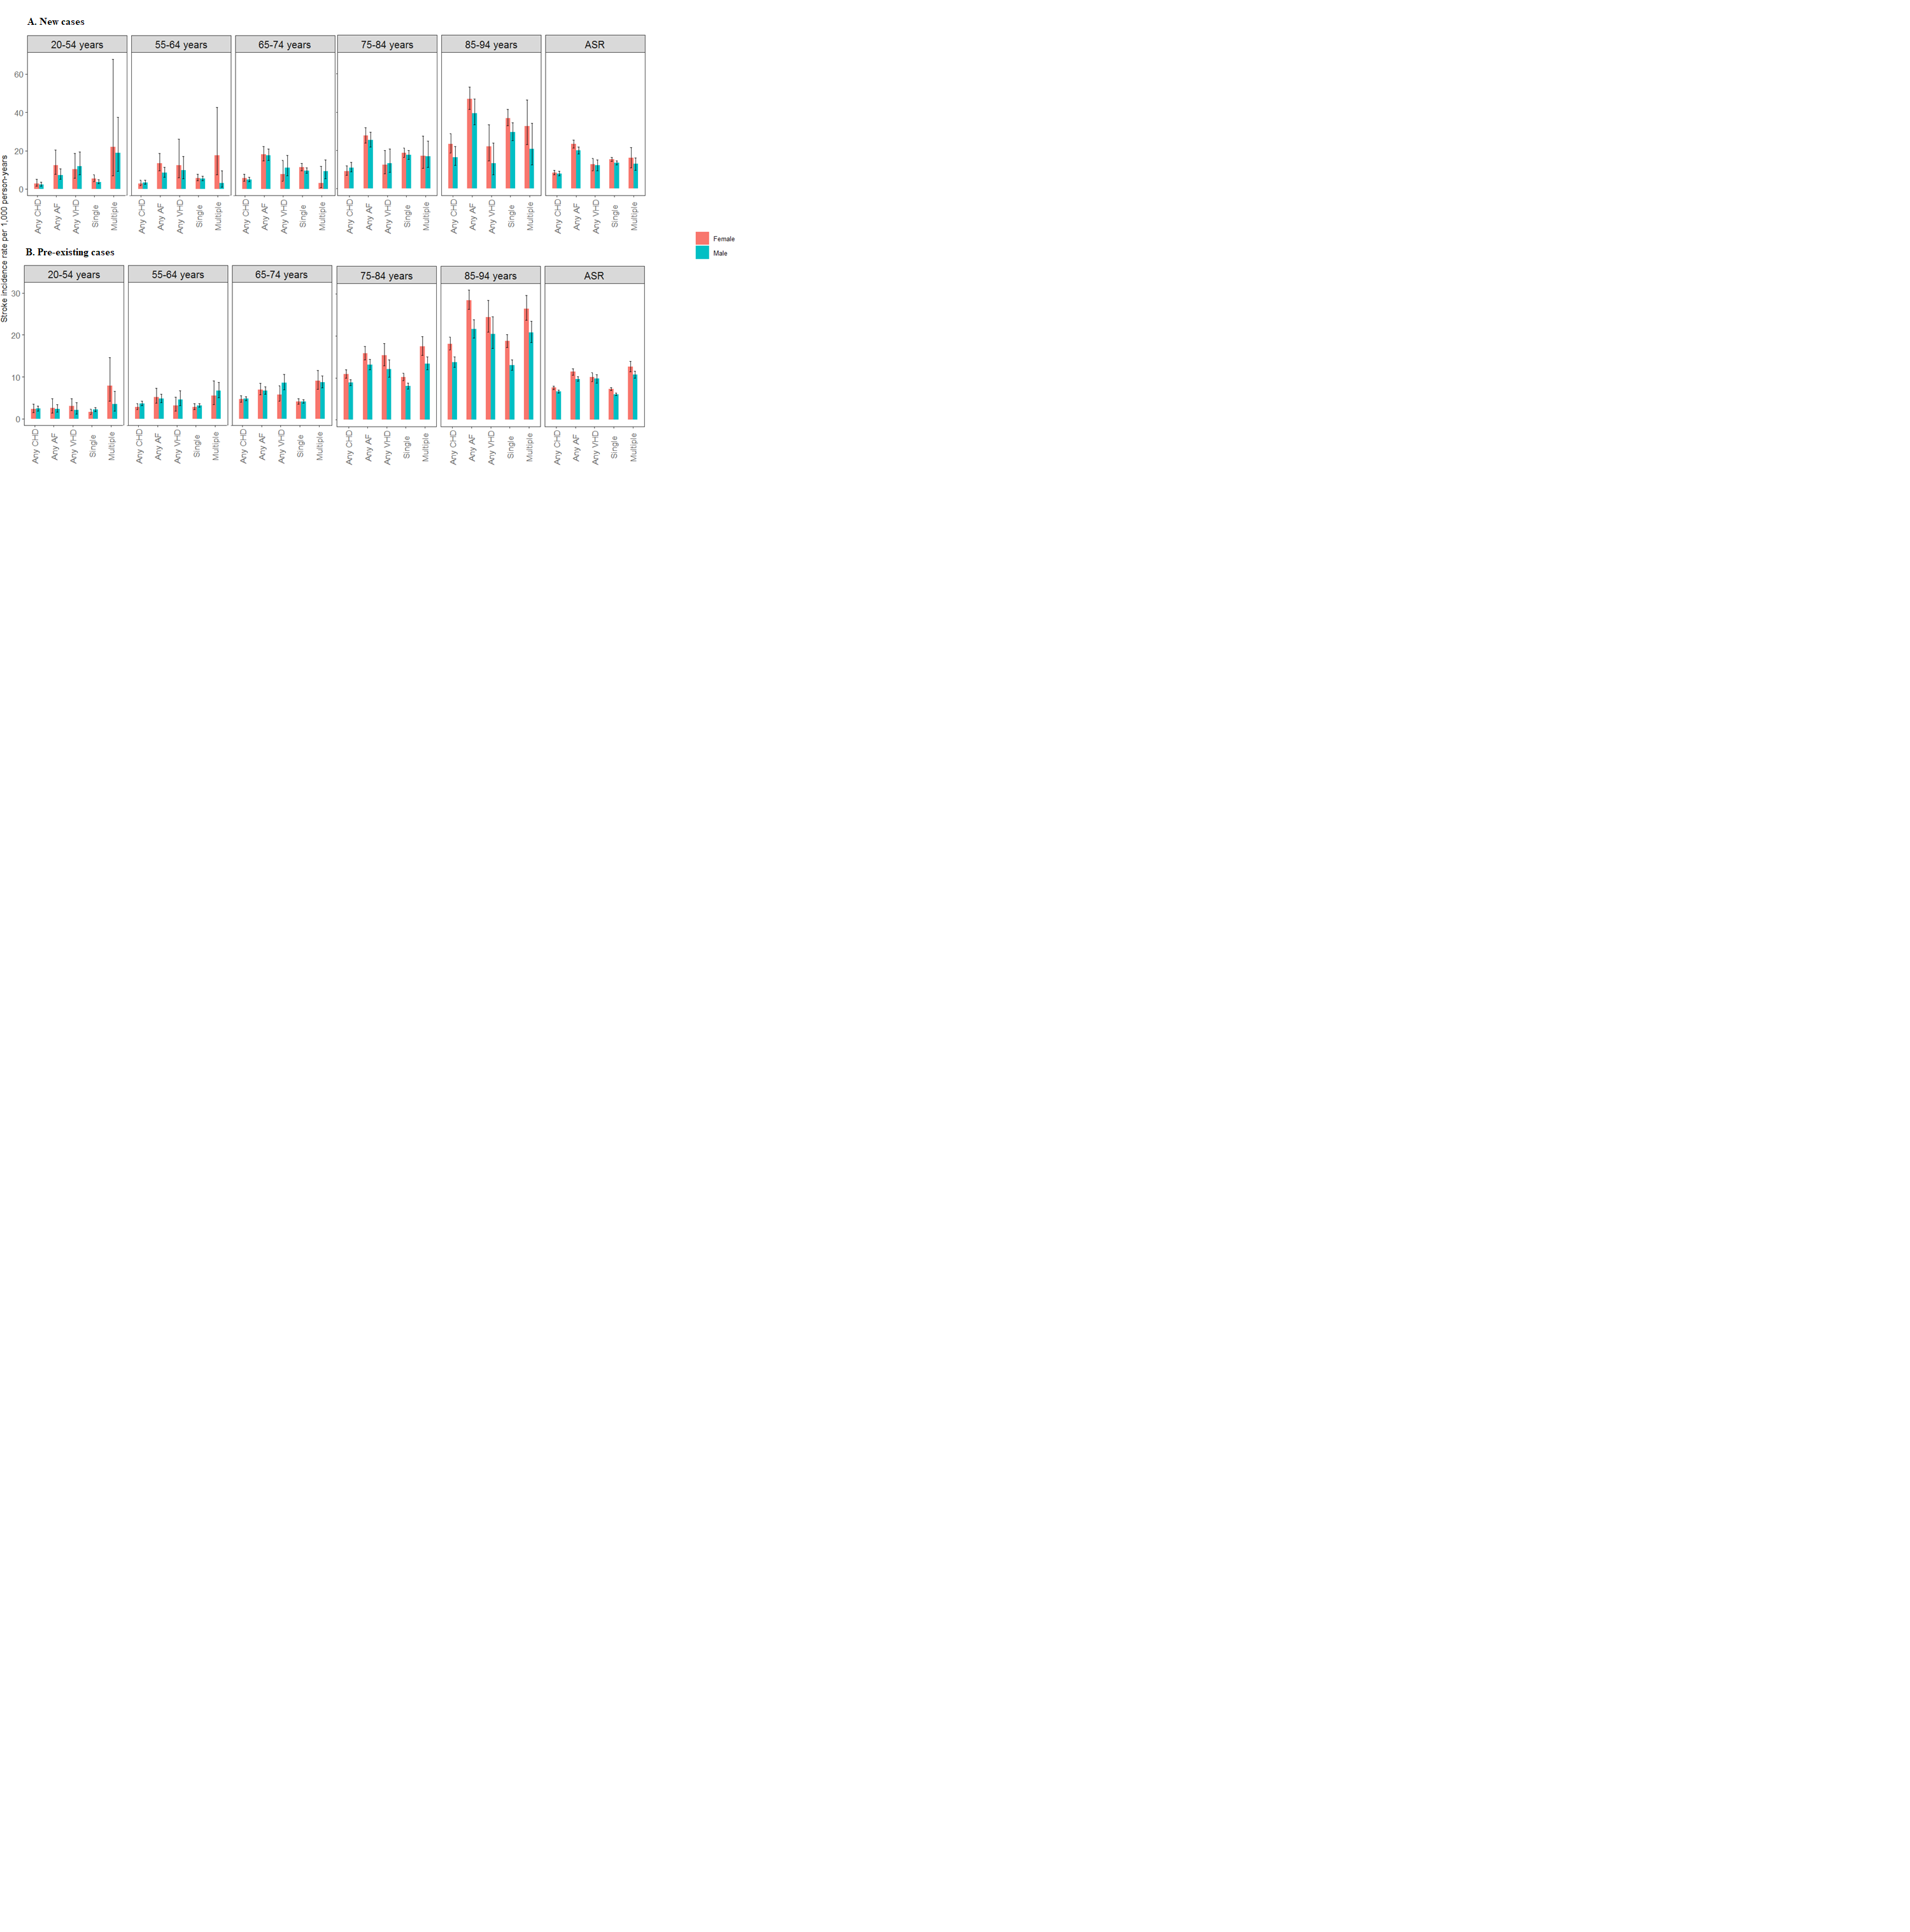


Supplementary Figure 3. Age-specific and age standardized stroke incidence rates ( 95% CI) in (A) new cardiac cases and (B) pre-existing cardiac cases, stratified by sex and cardiac condition

CHD, coronary heart disease; AF, atrial fibrillation; VHD, valvular heart disease; ASR, Age standardized rate


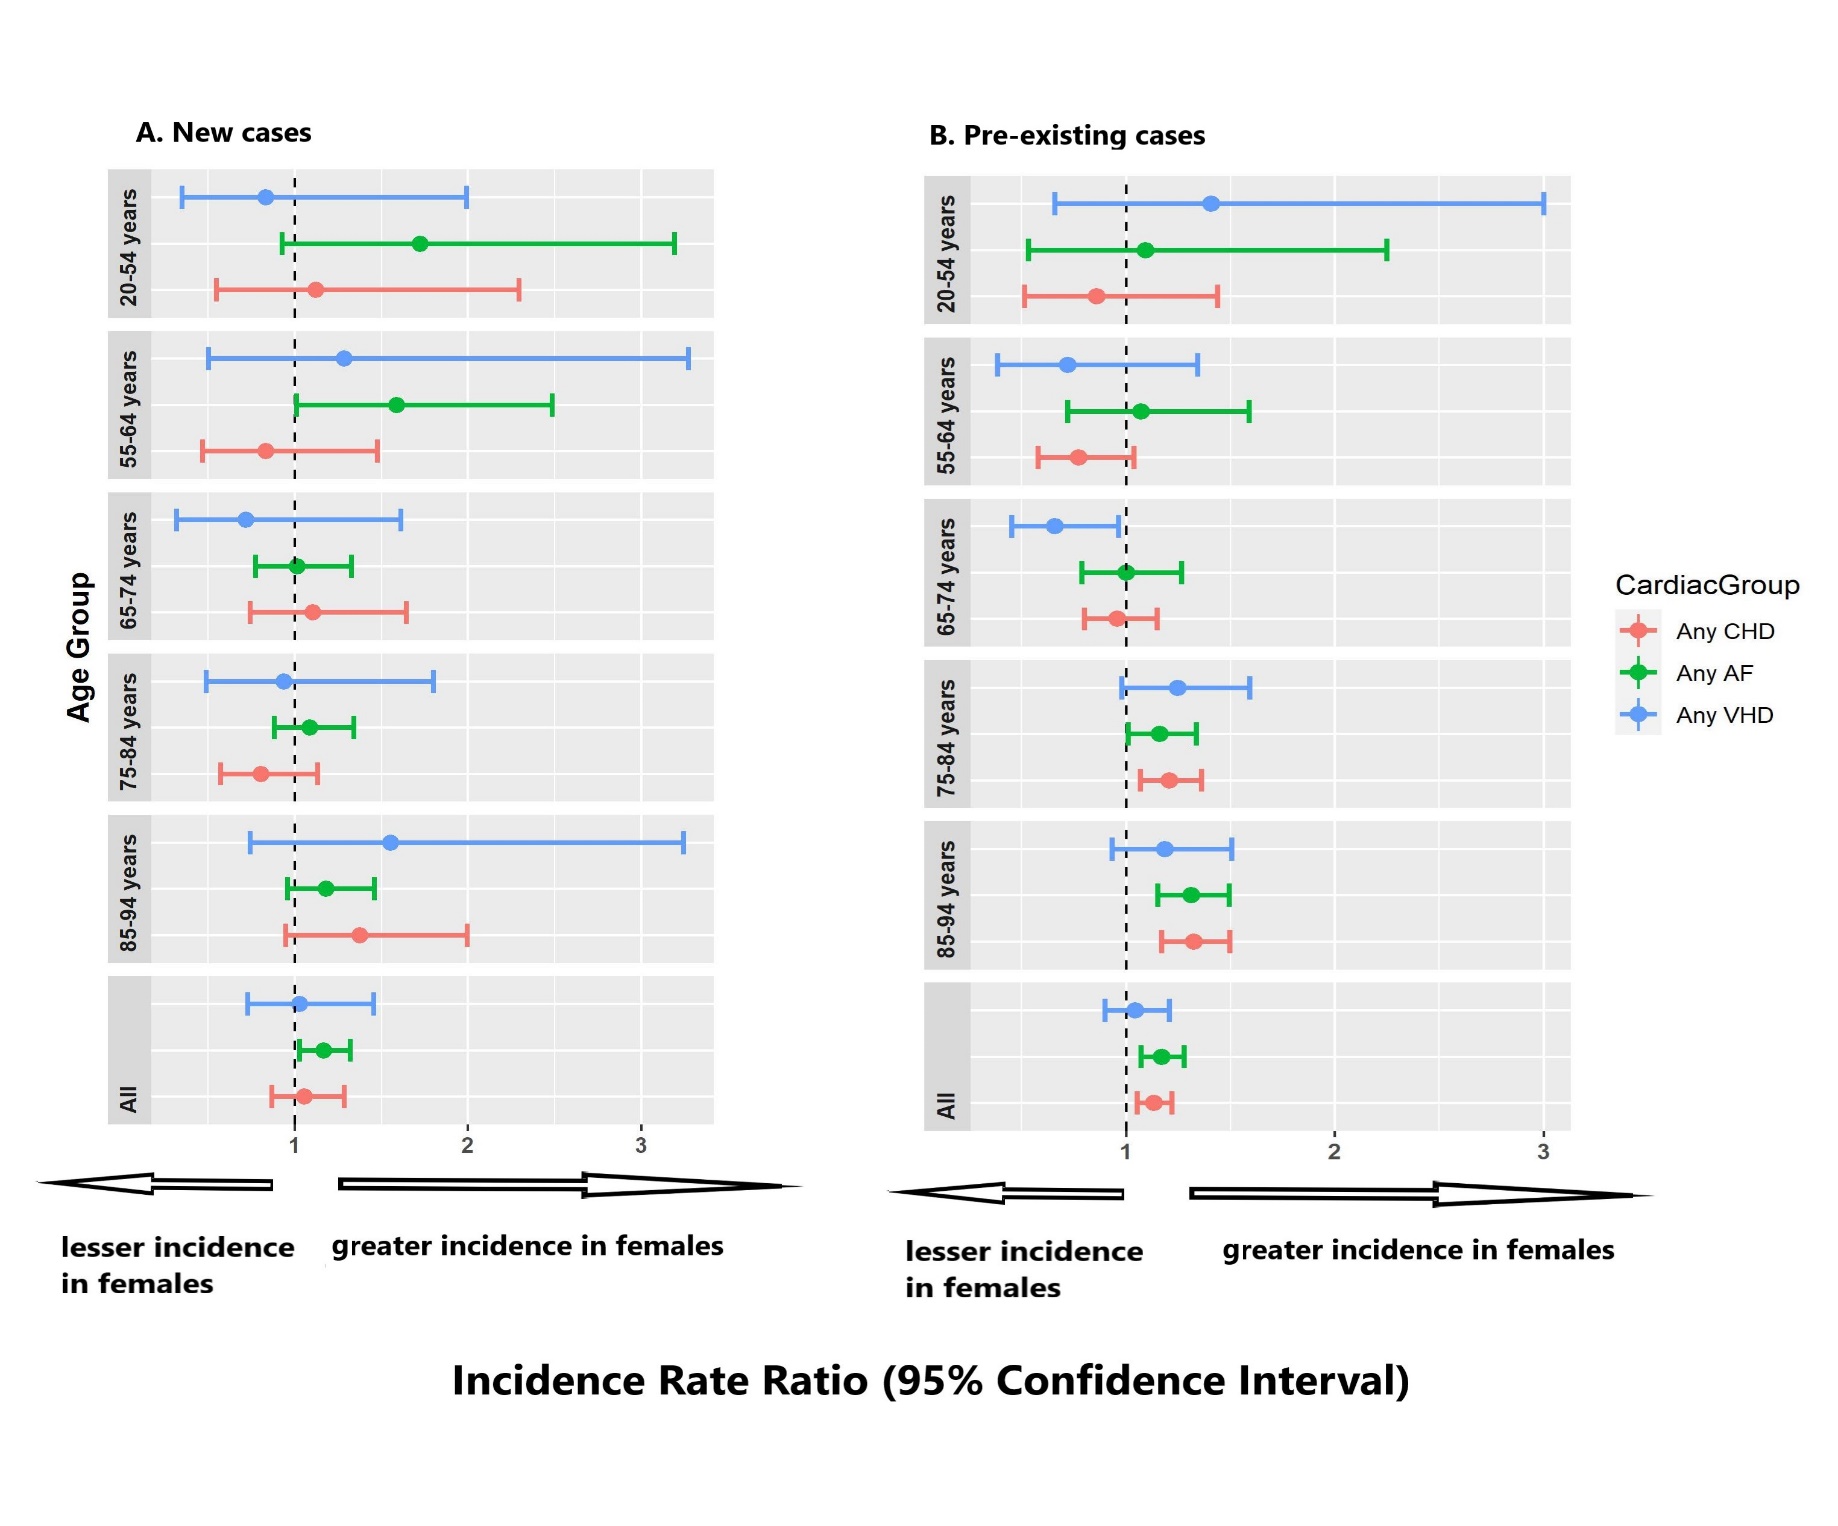


Supplementary Figure 4. Age-standardized incidence rate ratios in female versus males for (A) new cardiac cases and (B) pre-existing cardiac cases.

CHD, coronary heart disease; AF, atrial fibrillation; VHD, valvular heart disease
